# Supplementary material for: Flexible metal–organic frameworks as superior cathodes for rechargeable sodium-ion batteries
Source: Royal Society of Chemistry journal article supplement (doi:10.1039/c5ta03197d), 2015-01-01
Supplement: c5ta03197d1.pdf [file c5ta03197d1.pdf]

Electronic Supplementary material (ESI) for Journal of Materials Chemistry A  
This journal is © The Royal Society of Chemistry 2015

## **Electronic Supplementary Information (ESI)**

### **Flexible Metal-organic Frameworks as Superior Cathodes for Rechargeable Sodium-ion Batteries**

Ping Nie, Laifa Shen, Gang Pang, Yaoyao Zhu, Guiyin Xu, Yunhua Qing, Hui Dou and Xiaogang Zhang\*

College of Material Science and Engineering, Jiangsu Key Laboratory of Materials and Technologies for Energy Conversion, Nanjing University of Aeronautics and Astronautics, Nanjing 210016, P. R. China.

\*Corresponding author, azhangxg@nuaa.edu.cn; Tel: +86-25-52112918; Fax: +86-25-52112626.

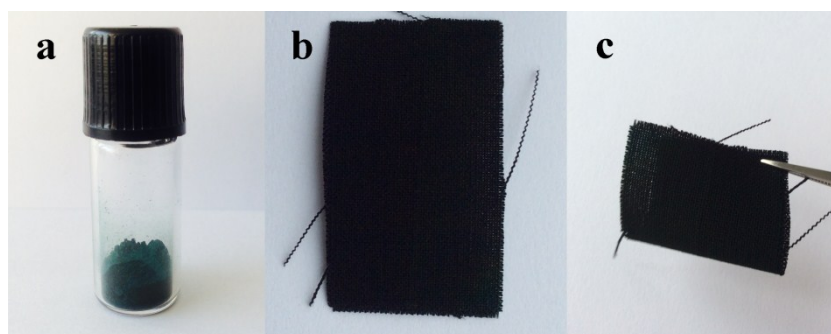

**Figure S1.** Photographs of (a) bare  $\text{FeFe}(\text{CN})_6$  nanoparticles and (b, c)  $\text{FeFe}(\text{CN})_6$ /carbonfiber composites.

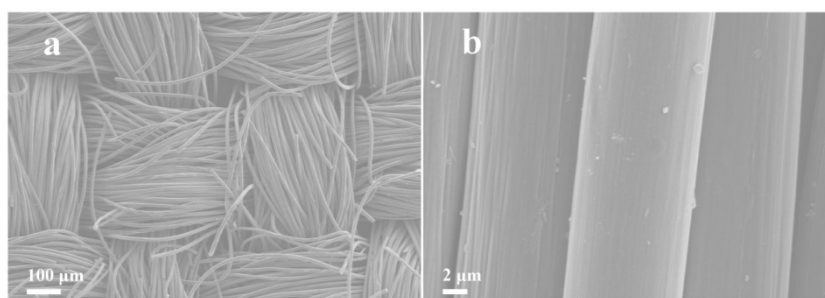

**Figure S2.** SEM images of acid-treated carbon cloth.

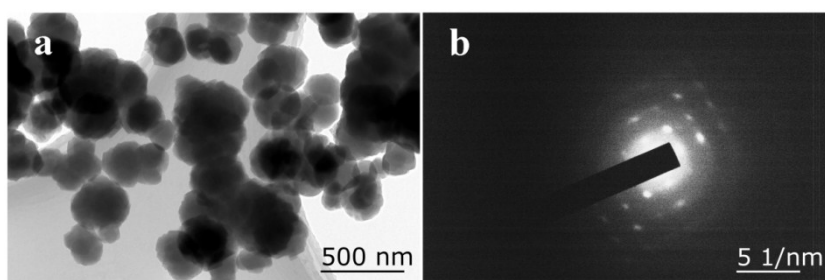

**Figure S3.** TEM image and SAED pattern of  $\text{FeFe}(\text{CN})_6$ .

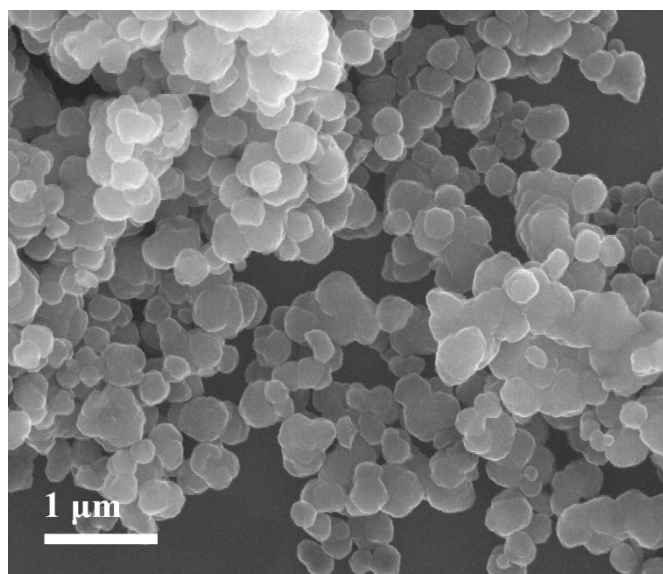

**Figure S4.** SEM image of bare  $\text{FeFe}(\text{CN})_6$  nanoparticles.

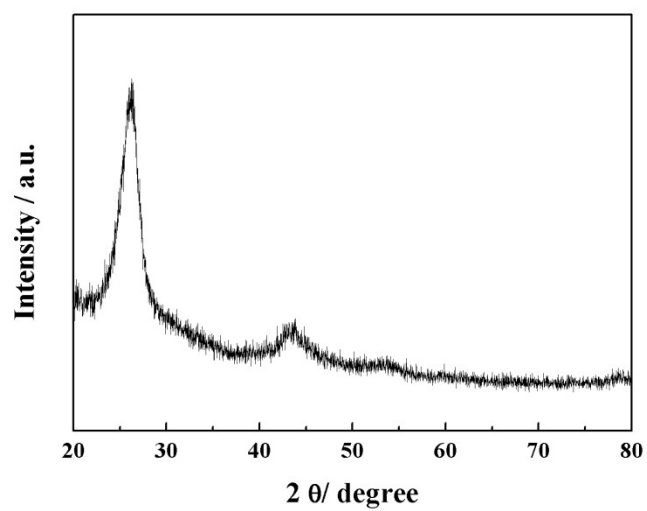

**Figure S5.** XRD pattern of the carbon textiles.

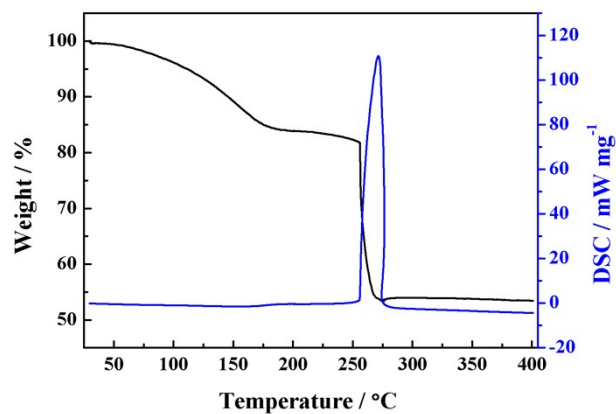

**Figure S6.** Thermogravimetric curve of  $\text{FeFe}(\text{CN})_6$  samples at a rate of  $10\text{ }^\circ\text{C min}^{-1}$  under air.

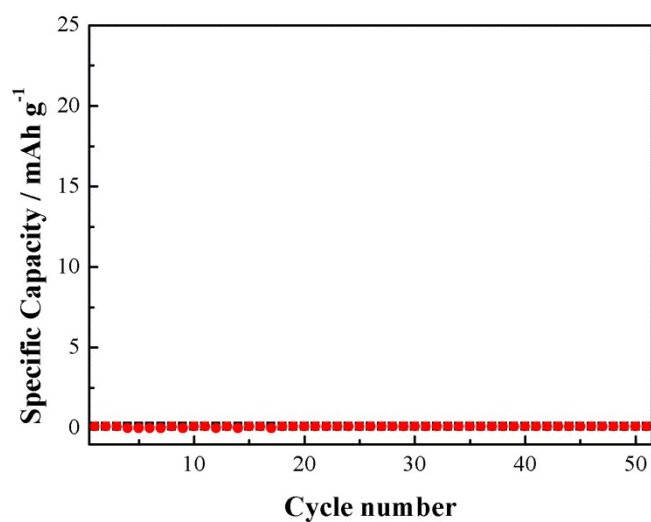

**Figure S7.** Cycling performance of the carbon textiles at a current density of  $50\text{ mA g}^{-1}$  in the voltage window of 2.0-4.0 V.

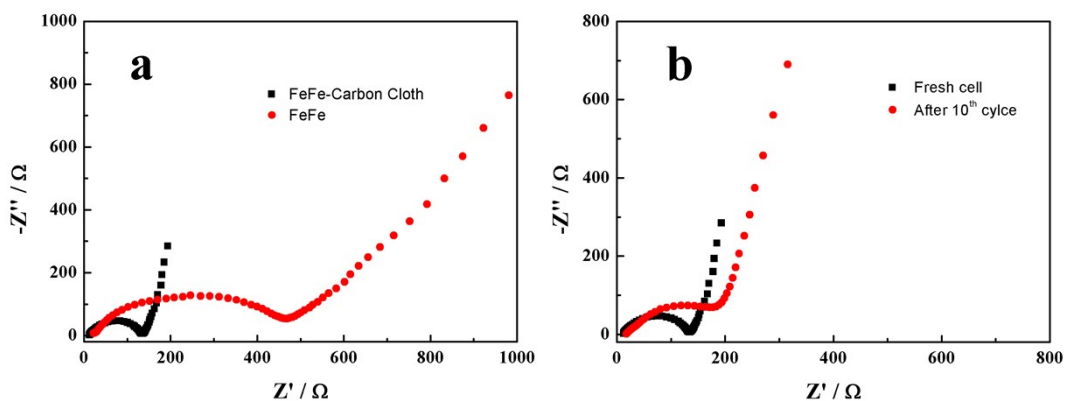

**Figure S8.** (a) Nyquist impedance plots of the  $\text{FeFe}(\text{CN})_6/\text{carbon}$  textiles and bare  $\text{FeFe}(\text{CN})_6$  electrodes measured before cycling, (b) Electrochemical impedance spectra of the the  $\text{FeFe}(\text{CN})_6/\text{carbon}$  cloth electrode.

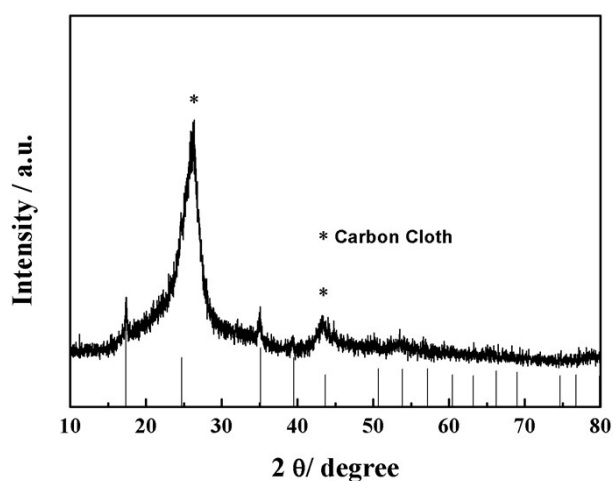

**Figure S9.** XRD pattern of the  $\text{FeFe}(\text{CN})_6/\text{carbon}$  cloth after 50 cycles at a current density of 0.5C.

To examine phase structure of the electrodes after cycling, X-ray diffraction (XRD) was investigated using a Rigaku Miniflex II diffractometer using  $\text{Cu K}\alpha$  radiation operated at 30 kV and 15 mA. Figure S9 shows XRD pattern of the  $\text{FeFe}(\text{CN})_6/\text{carbon}$  textiles after 50 cycles at a current density of 0.5C in the voltage range of 2.0-4.0 V.

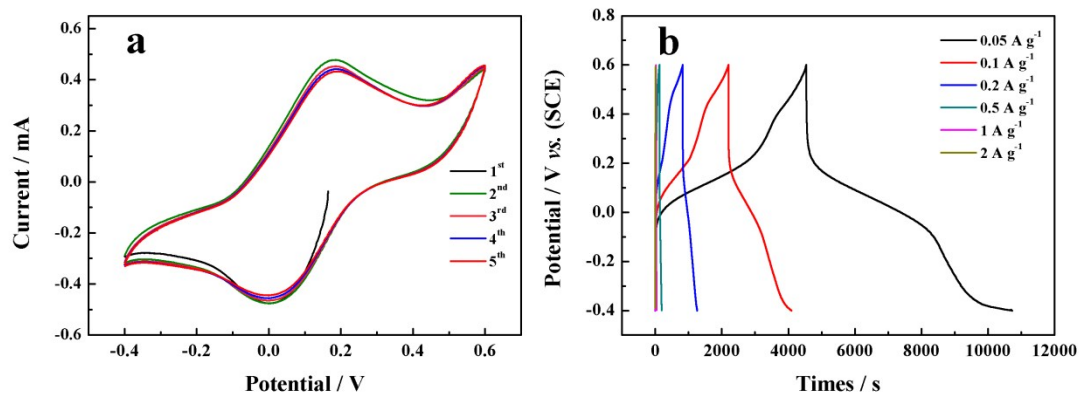

**Figure S10.** Aqueous sodium-ion battery performance of FeFe(CN)<sub>6</sub>/carbon cloth composites assessed from three-electrode measurements in 1 M NaNO<sub>3</sub> (pH=2): a) CV curves, b) galvanostatic charge-discharge voltage profiles at different current densities.

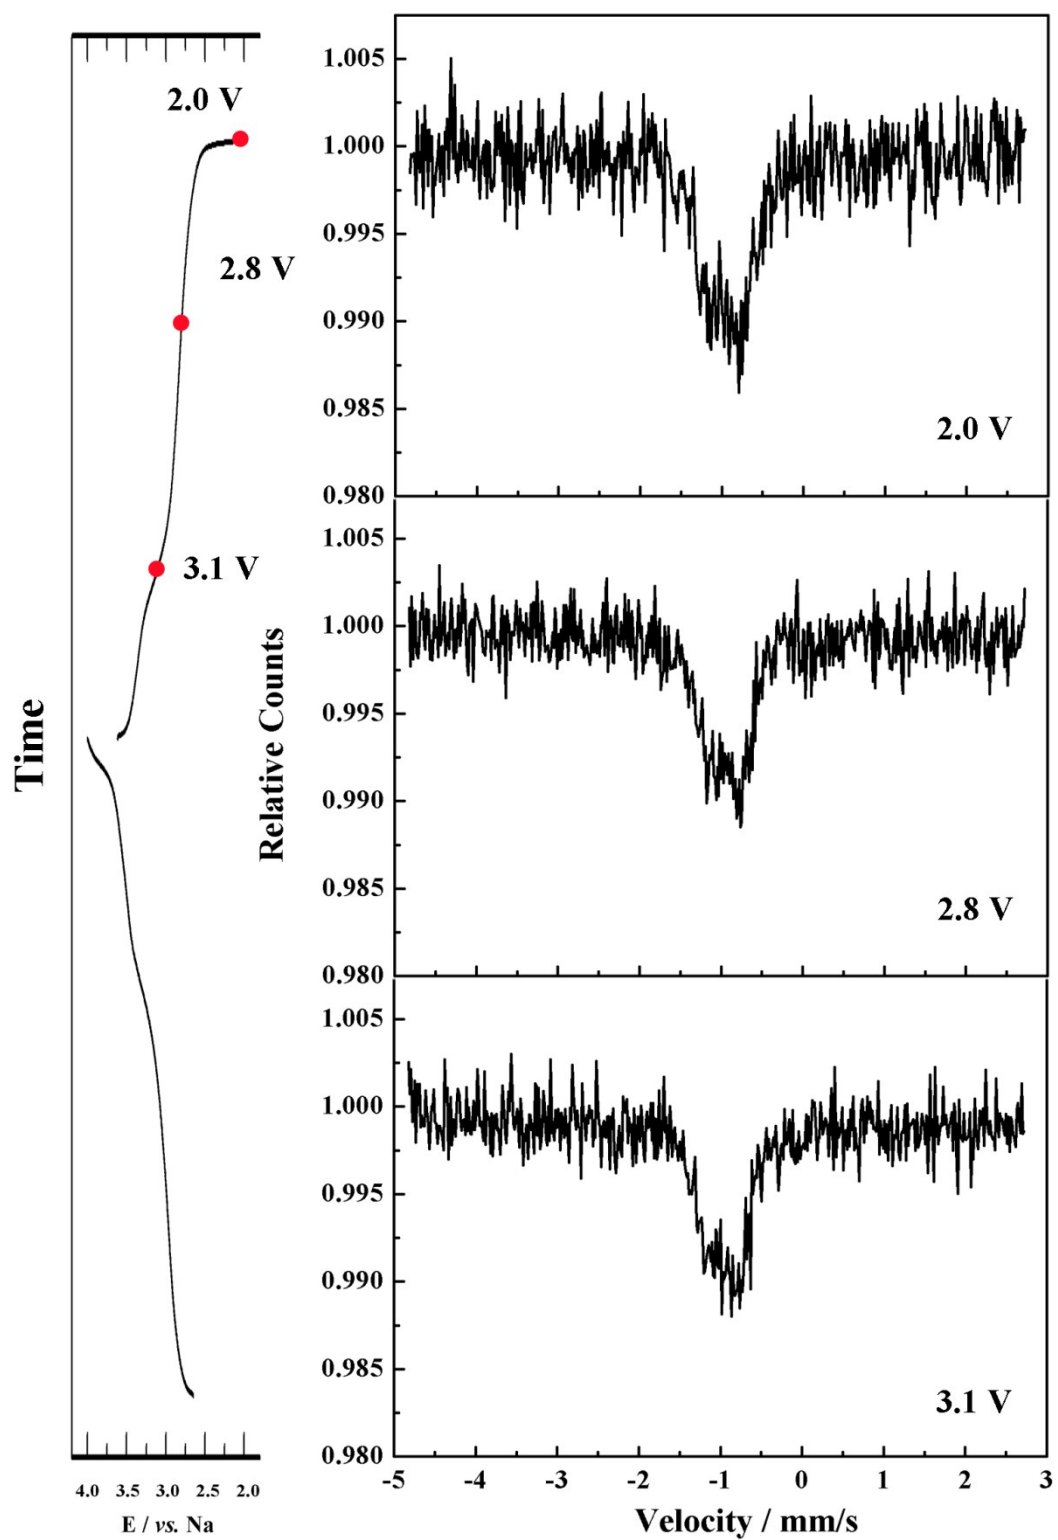

**Figure S11.** Galvanostatic charge-discharge curves and Mössbauer spectra of the  $\text{FeFe}(\text{CN})_6$  electrode discharged at different depths (Voltage = 2.0, 2.8, and 3.1 V).
